# Supplementary material for: Self-guided internet-based and mobile-based stress management for employees: results of a randomised controlled trial
Source: HighWire-hosted journal article supplement (doi:10.1136/oemed-2015-103269), 2016-02-16
Supplement: oemed-2015-103269supp_figure.pdf [file oemed-2015-103269supp_figure.pdf]

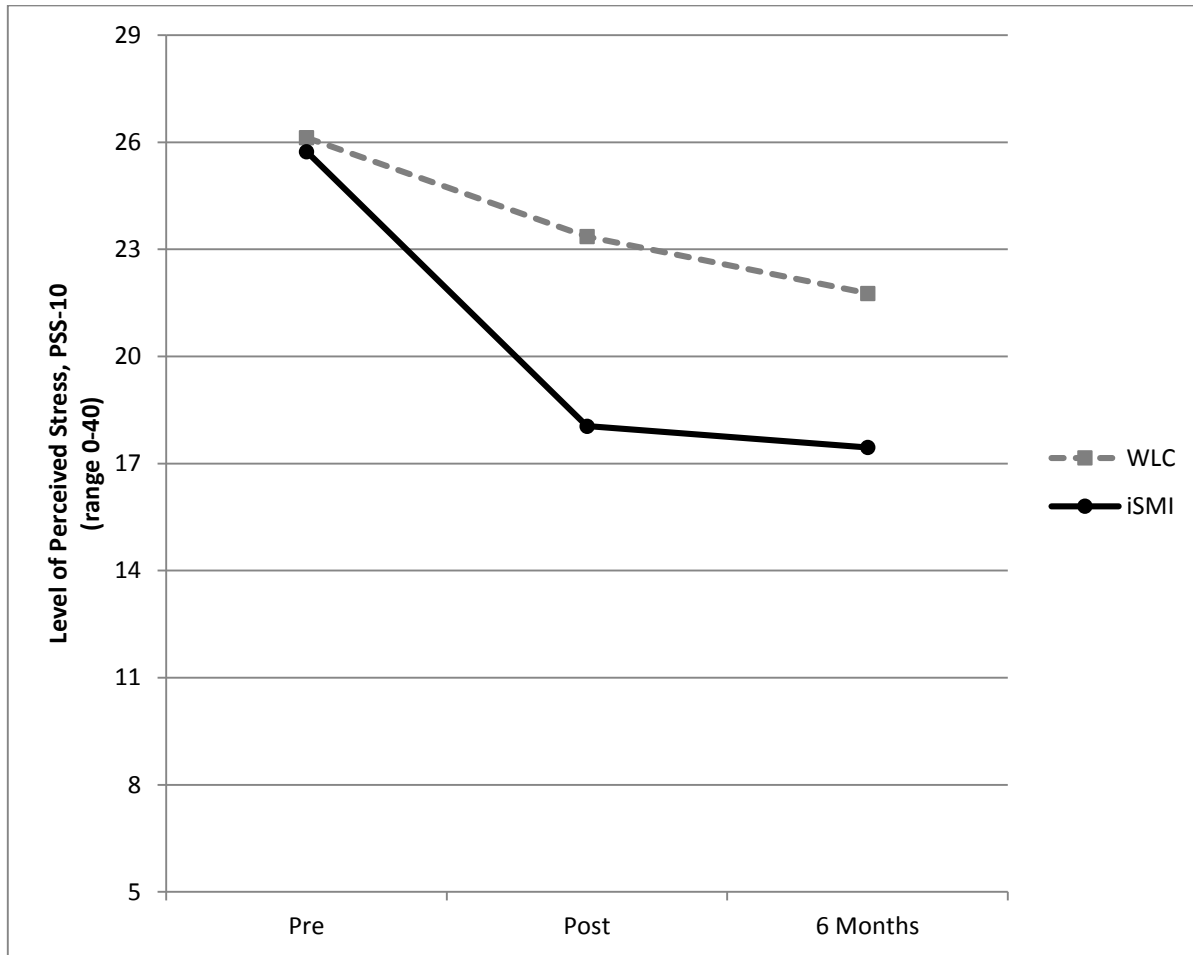

**Supplementary Figure 1.** Levels of perceived stress according to the PSS-10 for the iSMI and WLC groups at all assessment points for the ITT sample at pre-test (T1), post-test (T2), and six months (T3).

Abbreviations: PSS-10: Perceived Stress Scale (10 item version); WLC=Waitlist control group; and iSMI=Internet-based stress management intervention.
